# Supplementary material for: REG γ knockdown suppresses proliferation by inducing apoptosis and cell cycle arrest in osteosarcoma
Source: PeerJ journal article supplement (doi:10.7717/peerj.8954), 2020-04-15
Supplement: Figure_1_raw_data.zip [file Figure_1_raw_data.zip]

## Sheet: Sheet1
	hFOB1.19	MG-63	SaoS-2
2-△△Ct-1	1	2.85	4
2-△△Ct-2	1.33	3	3.78
2-△△Ct-3	1.5	3.25	4.19
